# Supplementary material for: Feasibility of a family-oriented mHealth intervention for Chinese Americans with type 2 diabetes: A pilot randomized control trial
Source: PubMed Central journal article supplement (PMC10927140; doi:10.1371/journal.pone.0299799), 2024-03-11
Supplement: pone.0299799.s004.pdf [file pone.0299799.s004.pdf]

## Approval of Submission

August 19, 2019

On 8/19/2019 the IRB reviewed and approved the following submission:

|                            |                                                                                                                                                                                                                                                                                                                                                                                                                                                                                                                                                                                                                                                                                                                        |
|----------------------------|------------------------------------------------------------------------------------------------------------------------------------------------------------------------------------------------------------------------------------------------------------------------------------------------------------------------------------------------------------------------------------------------------------------------------------------------------------------------------------------------------------------------------------------------------------------------------------------------------------------------------------------------------------------------------------------------------------------------|
| principal investigator     | Mary Sevick                                                                                                                                                                                                                                                                                                                                                                                                                                                                                                                                                                                                                                                                                                            |
| study number               | i19-01275                                                                                                                                                                                                                                                                                                                                                                                                                                                                                                                                                                                                                                                                                                              |
| study title                | Feasibility of a Family-oriented mHealth Intervention for Chinese Americans with Type 2 Diabetes                                                                                                                                                                                                                                                                                                                                                                                                                                                                                                                                                                                                                       |
| performance period         | 8/19/2019                                                                                                                                                                                                                                                                                                                                                                                                                                                                                                                                                                                                                                                                                                              |
| location(s)                | Charles B Wang (Other Locations)                                                                                                                                                                                                                                                                                                                                                                                                                                                                                                                                                                                                                                                                                       |
| sponsor(s)                 | Name: NIH-NIDDK                                                                                                                                                                                                                                                                                                                                                                                                                                                                                                                                                                                                                                                                                                        |
| review type                | Initial Study, Expedited Category 2,5,6,7;                                                                                                                                                                                                                                                                                                                                                                                                                                                                                                                                                                                                                                                                             |
| board name                 | All boards                                                                                                                                                                                                                                                                                                                                                                                                                                                                                                                                                                                                                                                                                                             |
| materials approved for use | <ul style="list-style-type: none"> <li>• Follow-up patient survey_08.12.2019.pdf, Category: IRB Protocol;</li> <li>• Study poster_08.12.2019.pdf, Category: Recruitment Materials;</li> <li>• ICF-Key-Information_08.15.2019.pdf, Category: Consent Form;</li> <li>• Baseline patient survey_08.12.2019.pdf, Category: IRB Protocol;</li> <li>• Follow-up family_friend survey_08.16.2019.pdf, Category: IRB Protocol;</li> <li>• Baseline family_friend survey_08.12.2019.pdf, Category: IRB Protocol;</li> <li>• AV consent_08.15.2019.pdf, Category: Consent Form;</li> <li>• Consent form_08.15.2019.pdf, Category: Consent Form;</li> <li>• Protocol_08.06.2019 (updated).pdf, Category: IRB Protocol;</li> </ul> |

The current IRB Status of your submission is: **Approved**. This submission was reviewed by the NYU School of Medicine's Institutional Review Board (IRB). During the review of your study, the IRB specifically considered:

1. the risks and anticipated benefits (if any) to your subjects
2. the selection of subjects
3. the procedures for securing and documenting informed consent
4. the safety of your subjects
5. the privacy of your subjects and confidentiality of the data

Your study cannot commence until all ancillary review decisions are complete. To determine the state of all ancillary reviews, go the MyStudies page of this study in Research Navigator. Ancillary review statuses are located on the top/right area of your study's main screen.

Note: Ensure that approval has been issued in MyAgreements/CRMS and the Clinical Research Support Unit ("CRSU") before you proceed with any aspect of this study, including the enrollment of human subjects.

## Review Notes

For NIH grant funded research approved before the revised Common Rule: the IRB has found the IRB approved protocol referenced above to be consistent with the NIH grant application.

Sincerely,

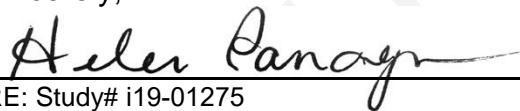

8/19/2019

RE: Study# i19-01275

Helen Panageas

Director, NYU SoM Institutional Review Board

Federalwide Assurance: FWA00004952

*NYU School of Medicine's IRB operates in accordance with Good Clinical Practices (GCP) and applicable laws and regulations. Federal rules allow IRBs to document their determination/authorization process in their policy manual. Determination letters generated by NYU SoM's IRB administration system are not physically signed as per policy. All approved study materials are clearly identified and locked in each study submission record within the IRB's administration system.*

## NYU School of Medicine IRB Policy

- All current IRB policy documents can be found on our [website](#)
- You must submit all modifications to this study (e.g., protocol updates, modified recruitment materials, consent forms, etc.) using Research Navigator to communicate with the IRB ("eSubmission") for review and approval prior to initiation of those change(s), except where necessary to eliminate apparent immediate hazards to the subject(s). Changes made to eliminate apparent immediate hazards to subjects must be reported to the IRB within 24 hours.
- All adverse and/or unanticipated event(s) that occur while conducting this study must immediately be reported to the IRB via eSubmission.
- You may only use IRB-approved copies of your consent form(s), questionnaire(s), letter(s), advertisement(s), etc. in your study. Never use expired consent forms.
- If modifications are made to the study or adverse events occur while conducting study, the PI must inform all research staff listed on this study.
- IRB's approval is valid as per the period indicated above. A reminder to submit a continuation (should one be required) will be e-mailed to the PI, PI Proxy and Primary Contact 90, 60 and 30 days prior to this study's expiration date if one is indicated. After expiration, a daily reminder will be sent for 30 days followed by a weekly reminder until the study receives re-approval or a study closure.
- Prior to initiating an IRB-approved study, you must receive written approval from an authorized representative for each site where your study will take place. Key contacts are:
  - Bellevue Hospital (BHC): if you are conducting all or part of your study at BHC, you must contact them to obtain additional approvals. BHC will be notified if any of their sites are selected as a location where your study takes place, but your team is obligated to contact them at [BellevueResearch@bellevue.nychhc.org](mailto:BellevueResearch@bellevue.nychhc.org) to find out what approvals are required before conducting any research at a BHC location.
  - CTSI - Clinical and Translational Science Institute, NYU School of Medicine [formerly General Clinical Research Center (GCRC)]: email [ctsi@nyulangone.org](mailto:ctsi@nyulangone.org)
  - NYU Langone Health Centers (Tisch Hospital/Rusk Institute/Co-op Care/HJD/Perlmutter Cancer Center) site approval is handled for you automatically (as needed) by the CRSU
- The IRB may suspend or terminate studies that are not in compliance with NYU Langone Health/School of Medicine Policies & Procedures and the requirements of the Institution's Federal Wide Assurance with the federal government.
- Direct IRB questions and comments to 212-263-4110 or [IRB-INFO@nyulangone.org](mailto:IRB-INFO@nyulangone.org)

## [Let Us Know How We're Doing](#)

Click on the title above to send us feedback via a short, anonymous survey. Providing exceptional customer service is a top priority of the IRB and your responses will help us understand how we can continue to improve our service to the research community.

## IRB Board Rosters

Effective **2019-08-06** FWA#00004952

Quorum is simple majority only = greater than half

### Board A (Effective 2019-08-06)

**Members; Quorum of 7; 8 for prisoner-related studies**

| Member                       | Degree(s) | Science – Non-Science | Specialty                     | Affiliated With NYU | Alternate(s)                                                                          |
|------------------------------|-----------|-----------------------|-------------------------------|---------------------|---------------------------------------------------------------------------------------|
| More, Frederick (Chair)      | DDS       | S                     | Dentistry – Pediatrics        | Y                   | Hazen, Katz, Nishawala, Novik, Wissner-Greene                                         |
| Donnino, Robert (Vice Chair) | MD        | S                     | Medicine – Cardiology         | Y                   | Vice Chair Alternates: Hazen, Nishawala, Greene<br>Member Alternates: Culliford, Katz |
| Basu Roy, Upal               | PhD, MPH  | S                     | Community Representative      | N                   | Abramovitz, Raskin, Wu                                                                |
| Bliss, Samuel                | PharmD    | S                     | Pharmacy                      | Y                   | Ballani, Dubrobskaya, Faiena, Wong                                                    |
| Diefenbach, Catherine        | MD        | S                     | Oncology                      | Y                   | Esteva, Kwa, Moskovitz, Novik, Rapp, Ryan, Saint Fleur, Schiff, Wu                    |
| Gallagher, Richard           | PhD       | S                     | Child & Adolescent Psychiatry | Y                   | Barr, Bogenschutz, Chervinsky, Frankle, McGregor, Nishawala, Rotrosen                 |
| Godina, Marina               | RN        | S                     | IRB Administration; Nursing   | Y                   | Berkovitz, Jeschke-Lopez, Johnson                                                     |
| Kadidal, Shane *             | JD        | NS                    | Law – Prisoner Advocate       | N                   |                                                                                       |
| Lamont, Justin               | MD        | S                     | Orthopedic Surgery            | Y                   | Kirsch, Leucht, Rapp                                                                  |
| Panageas, Helen              | BA        | NS                    | IRB Administration            | Y                   | Dvorkin, Liu, McGowan, Vieira, Wallach                                                |
| Ross-Rizzo, John             | MD        | S                     | Neurology                     | Y                   | Barr, Berk, Chervinsky, Lewis                                                         |
| Ross, Stephen                | MD        | S                     | Psychiatry                    | Y                   | Barr, Bogenschutz, Chervinsky, Frankle, McGregor, Nishawala, Rotrosen                 |
| Storey, Elizabeth            | PhD       | S                     | Radiology                     | Y                   | Bencardino, Fieremans, Gonen                                                          |
| Wang, Jing                   | MD        | S                     | Anesthesiology                | Y                   | Kim                                                                                   |

*Counts toward quorum only when reviewing studies subject to Subpart C*

**Board B (Effective 2019-08-06)****Members; Quorum of 9, 9 for prisoner-related studies**

| Member                     | Degree(s) | Science – Non-Science | Specialty                   | Affiliated With NYU | Alternate(s)                                                                                          |
|----------------------------|-----------|-----------------------|-----------------------------|---------------------|-------------------------------------------------------------------------------------------------------|
| Katz, Stuart (Chairman)    | MD<br>PhD | S                     | Cardiology                  | Y                   | Donnino, Hazen, More, Nishawala, Novik, Wissner-Greene                                                |
| Hazen, Alexes (Vice Chair) | MD        | S                     | Surgery – Plastic           | Y                   | Vice Chair Alternates: Donnino, More, Nishawala, Novik, Wissner-Greene<br>Member Alternates: DeLacure |
| Bartlett, Rachel           | PhD       | S                     | Radiology                   | Y                   | Bencardino, Fieremans, Gonen, Storey                                                                  |
| Berk, Thomas               | MD        | S                     | Neurology                   | Y                   | Barr, Lewis, Ross-Rizzo                                                                               |
| Brar, Preneet              | MD        | S                     | Pediatric Endocrinology     | Y                   | Ramirez, Tunik, Wissner-Greene                                                                        |
| Culliford, Alfred          | MD        | S                     | Surgery – Cardiothoracic    | Y                   | Donnino, Lamont, Rapp                                                                                 |
| Dubrovskaya, Yanina        | PharmD    | S                     | Pharmacy                    | Y                   | Ballani, Bliss, Faiena, Wong                                                                          |
| Esteva, Francisco          | MD        | S                     | Oncology                    | Y                   | Diefenbach, Moskovits, Novik, Rapp, Ryan, Saint Fleur, Schiff, Wu                                     |
| Frankle, William Gordon    | MD        | S                     | Psychiatry                  | Y                   | Barr, Bogenschutz, Gallagher, McGregor, Nishawala, Ross, Rotrosen                                     |
| Godina, Marina             | RN        | S                     | IRB Administration; Nursing | Y                   | Berkovitz, Jeschke-Lopez Johnson                                                                      |
| Kadidal, Shane *           | JD        | NS                    | Law-Prisoner Advocate       | N                   |                                                                                                       |
| Kirsch, Thorsten           | PhD       | S                     | Orthopedic Surgery          | Y                   | Lamont, Leucht, Rapp                                                                                  |
| Kwa, Maryann               | MD        | S                     | Oncology                    | Y                   | Diefenbach, Moskovits, Novik, Rapp, Ryan, Saint Fleur, Schiff, Wu                                     |
| McGowan, Richard           | MLS       | NS                    | Public Services             | Y                   | Vieira                                                                                                |
| Nolan, Anna                | MD        | S                     | Pulmonary                   | Y                   |                                                                                                       |
| Panageas, Helen            | BA        | NS                    | IRB Administration          | Y                   | Dvorkin, Liu, Vieira, Wallach                                                                         |
| Raskin, Joyce              | JD        | NS                    | Community Representative    | Y                   | Abramovitz, Basu Roy, Wu                                                                              |

\*Counts toward quorum only when reviewing studies subject to Subpart C

**Board C (Effective 2019-08-06)****Members; Quorum of 6; 7 for prisoner-related studies**

| Member                          | Degree(s) | Science – Non-Science | Specialty                     | Affiliated With NYU | Alternate(s)                                                                                                                                                        |
|---------------------------------|-----------|-----------------------|-------------------------------|---------------------|---------------------------------------------------------------------------------------------------------------------------------------------------------------------|
| Novik, Yelena (Chair)           | MD        | S                     | Oncology                      | Y                   | Donnino, Hazen, Katz, More, Nishawala, Wissner-Greene                                                                                                               |
| Nishawala, Melissa (Vice Chair) | MD        | S                     | Child & Adolescent Psychiatry | Y                   | Vice Chair Alternates: Donnino, Hazen, Katz, More, Wissner-Greene<br>Member Alternates: Barr, Bogenschutz, Chervinsky, Frankle, Gallagher, McGregor, Ross, Rotrosen |
| Godina, Marina                  | RN        | S                     | IRB Administration; Nursing   | Y                   | Berkovitz, Jeschke-Lopez, Johnson                                                                                                                                   |
| Chervinsky, Alexander B         | PhD       | S                     | Neuropsychology               | Y                   | Barr, Bogenschutz, Gallagher, Lewis, McGregor, Nishawala, Ross, Rotrosen                                                                                            |
| Kadidal, Shane *                | JD        | NS                    | Law – Prisoner Advocate       | N                   |                                                                                                                                                                     |
| Kim, Sunmi                      | MD        | S                     | Anesthesiology                | Y                   | Wang                                                                                                                                                                |
| Panageas, Helen                 | BA        | NS                    | IRB Administration            | Y                   | Dvorkin, Liu, McGowan, Wallach                                                                                                                                      |
| Schiff, Peter                   | MD        | S                     | Radiation Oncology            | Y                   | Diefenbach, Esteva, Kwa, Moskovits, Rya, Saint Fleur                                                                                                                |
| Vieira, Dorice                  | MA        | NS                    | Public Services               | Y                   | McGowan                                                                                                                                                             |
| Wong, Doris                     | PharmD    | S                     | Pharmacy                      | Y                   | Ballani, Bliss, Dubrovskaya, Faiena                                                                                                                                 |
| Wu, Jennifer                    | MD        | S                     | Oncology                      | Y                   | Diefenbach, Esteva, Kwa, Moskovits, Ryan, Saint Fleur                                                                                                               |
| Wu, Lillian                     | BA, MA    | NS                    | Community Representative      | N                   | Abramovitz, Basu Roy, Raskin                                                                                                                                        |

\*Counts toward quorum only when reviewing studies subject to Subpart C

**Board D (Effective 2019-08-06)****Members; Quorum of 9; 9 for prisoner-related studies**

| Member                             | Degree(s)    | Science<br>–<br>Non-<br>Science | Specialty                         | Affiliated<br>With<br>NYU | Alternate(s)                                                                                  |
|------------------------------------|--------------|---------------------------------|-----------------------------------|---------------------------|-----------------------------------------------------------------------------------------------|
| More, Frederick (Chair)            | DDS          | S                               | Dentistry – Pediatrics            | Y                         | Donnino, Hazen, Katz, Nishawala, Novik, Wissner-Greene                                        |
| Wissner-Greene, Loren (Vice Chair) | MD, MA       | S                               | Medicine – Endocrinology – Ob-Gyn | Y                         | Vice Chair Alternates: Donnino, Hazen, Katz, More, Nishawala, Novik, Member Alternate: Brar   |
| Abramovitz, Rachel                 | LL.M., LL.B. | NS                              | Community Representative          | N                         | Basu Roy, Raskin, Wu                                                                          |
| Ballani, Kanika                    | PharmD       | S                               | Pharmacy                          | Y                         | Bliss, Dubrovskaya, Faiena, Wong                                                              |
| Barr, William                      | PhD          | S                               | Neuropsychology                   | Y                         | Berk, Chervinsky, Frankle, Gallagher, Lewis, McGregor, Nishawala, Ross, Ross-Rizzo, Rotrosen, |
| Bogenschutz, Michael               | MD           | S                               | Psychiatry                        | Y                         | Chervinsky, Frankle, Gallagher, McGregor, Nishawala, Ross, Rotrosen                           |
| Dedania, Vaidehi                   | MD           | S                               | Ophthalmology                     | Y                         |                                                                                               |
| Godina, Marina                     | RN           | S                               | IRB Administration; Nursing       | Y                         | Berkovitz, Jeschke-Lopez, Johnson                                                             |
| Gonen, Oded                        | PhD          | S                               | Radiology                         | Y                         | Bartlett, Bencardino, Fieremans, Storey                                                       |
| Kadidal, Shane *                   | JD           | NS                              | Legal – Prisoner Advocate         | N                         |                                                                                               |
| Leucht, Philipp                    | MD, PhD      | S                               | Orthopaedic Trauma                | Y                         | Kirsch, Lamont, Rapp                                                                          |
| Mehta-Lee, Shilpi                  | MD           | S                               | Ob-Gyn                            | Y                         |                                                                                               |
| Panageas, Helen                    |              | NS                              | IRB Administration                | Y                         | Dvorkin, Liu, McGowan, Vieira, Wallach                                                        |
| Ramirez, Michelle                  | MD           | S                               | Pediatric Critical Care           | Y                         | Brar, McGregpr, Oshva, Tunik                                                                  |
| Ryan, Theresa                      | MD           | S                               | Oncology                          | Y                         | Diefenbach, Esteva, Kwa, Novik, Rapp, Schiff, Wu                                              |
| Saint Fleur, Shella                | MD           | S                               | Oncology                          | Y                         | Diefenbach, Esteva, Kwa, Novik, Rapp, Schiff, Wu                                              |

\*Counts toward quorum only when reviewing studies subject to Subpart C

**Board E (Effective 2019-08-06)****Members; Quorum of 4; 4 for prisoner-related studies**

| Member                    | Degree(s) | Science<br>–<br>Non-<br>Science | Specialty                | Affiliated<br>With<br>NYU | Alternate(s)                                                                                                                        |
|---------------------------|-----------|---------------------------------|--------------------------|---------------------------|-------------------------------------------------------------------------------------------------------------------------------------|
| More, Frederick (Chair)   | DDS       | S                               | Dentistry                | Y                         | Donnino, Hazen, Katz,<br>Nishawala, Novik, Wissner-<br>Greene                                                                       |
| Katz, Stuart (Vice-Chair) | MD        | S                               | Cardiology               | Y                         | Vice Chair Alternates:<br>Donnino, Hazen, More,<br>Nishawala, Novik, Wissner-<br>Greene<br>Member Alternates: Culliford,<br>Donnino |
| Johnson, Nadia            | MS        | S                               | IRB Administration       | Y                         | Berkovitz, Godina, Jeschke-<br>Lopez                                                                                                |
| Wu, Jennifer              | MD        | S                               | Oncology                 | Y                         | Diefenbach, Esteva, Kwa,<br>Moskovits, Novik, Rapp,<br>Ryan, Saint Fleur, Schiff                                                    |
| Kadidal, Shane *          | JD        | NS                              | Law-Prisoner Advocate    | N                         |                                                                                                                                     |
| Panageas, Helen           |           | NS                              | IRB Administration       | Y                         | Dvorkin, Liu, McGowan,<br>Vieira, Wallach                                                                                           |
| Raskin, Joyce             | JD        | NS                              | Community Representative | Y                         | Abramovitz, Basu Roy, Wu                                                                                                            |

\*Counts toward quorum only when reviewing studies subject to Subpart C

## Alternates

| Alternate               | Degree(s)    | Science – Non-Science | Specialty                        | Affiliated With NYU | Alternate For                                                    |
|-------------------------|--------------|-----------------------|----------------------------------|---------------------|------------------------------------------------------------------|
| Abramovitz, Rachel      | LL.M., LL.B. | NS                    | Community Representative         | N                   | Basu Roy, Raskin, Wu                                             |
| Ballani, Kanika         | PharmD       | S                     | Pharmacy                         | Y                   | Bliss, Dubrovskaya, Wong                                         |
| Barr, William           | PhD          | S                     | Neuropsychology                  | Y                   | Berk, Chevinsky, Frankle, Gallagher, Nishawala, Ross, Ross-Rizzo |
| Bartlett, Rachel        | PhD          | S                     | Radiology                        | Y                   | Gonen, Storey                                                    |
| Basu Roy, Upal          | PhD, MPH     | S                     | Community Representative         | Y                   | Abramovitz, Raskin, Wu                                           |
| Bencardino, Jenny       | MD           | S                     | Radiology                        | Y                   | Bartlett, Gonen, Schiff                                          |
| Berk, Thomas            | MD           | S                     | Neurology                        | Y                   | Barr, Ross-Rizzo                                                 |
| Berkovitz, David        | MD           | S                     | IRB Administration               | Y                   | Godina                                                           |
| Bliss, Samuel           | PharmD       | S                     | Pharmacy                         | Y                   | Ballani, Dubrovskaya, Wong                                       |
| Bogenschutz, Michael    | MD           | S                     | Psychiatry                       | Y                   | Barr, Chevinsky, Frankle, Gallagher, Nishawala, Ross             |
| Brar, Preneet           | MD           | S                     | Pediatric Endocrinology          | Y                   | Ramirez, Wissner-Greene                                          |
| Chervinsky, Alexander   | PhD          | S                     | Neuropsychology                  | Y                   | Barr, Bogenschutz, Gallagher, Nishawala, Ross, Ross-Rizzo        |
| Culliford, Alfred       | MD           | S                     | Surgery – Cardiothoracic         | Y                   | Donnino, Katz                                                    |
| DeLacure, Mark D        | MD           | S                     | Otolaryngology & Plastic Surgery | Y                   | Hazen                                                            |
| Diefenbach, Catherine   | MD           | S                     | Oncology                         | Y                   | Esteva, Kwa, Ryan, Saint Fleur, Schiff, Wu                       |
| Donnino, Robert         | MD           | S                     | Medicine – Cardiology            | Y                   | Culliford Hazen, Katz, More, Nishawala, Novik, Wissner-Greene    |
| Dubrovskaya, Yanina     | PharmD       | S                     | Pharmacy                         | Y                   | Ballani, Bliss, Wong                                             |
| Dvorkin, Ella           |              | NS                    | IRB Administration               | Y                   | Panageas                                                         |
| Esteva, Francisco       | MD           | S                     | Oncology                         | Y                   | Diefenbach, Kwa, Ryan, Saint Fleur, Schiff, Wu                   |
| Faiena, Mark            | PharmD       | S                     | Pharmacy                         | Y                   | Ballani, Bliss, Dubrovskaya, Wong                                |
| Fieremans, Els          | PhD          |                       | Radiology                        | Y                   | Bartlett, Gonen, Storey                                          |
| Frankle, William Gordon | MD           | S                     | Psychiatry                       | Y                   | Barr, Bogenschutz, Gallagher, Nishawala, Ross                    |
| Gallagher, Richard      | PhD          | S                     | Child & Adolescent Psychiatry    | Y                   | Chervinsky, Frankle, Nishawala, Ross                             |
| Gonen, Oded             | PhD          | S                     | Radiology                        | Y                   | Bartlett, Storey                                                 |
| Hazen, Alexes           | MD           | S                     | Plastic Surgery                  | Y                   | Katz, More, Nishawala, Novik, Wissner-Greene                     |
| Jeschke-Lopez, Ikoa     | MD           | S                     | IRB Administration               | Y                   | Godina                                                           |
| Johnson, Nadia          | MS           | S                     | IRB Administration               | Y                   | Godina                                                           |
| Katz, Stuart            | MD           | S                     | Cardiology                       | Y                   | Donnino, Hazen, More, Nishawala, Novik, Wissner-Greene           |
| Kim, Sunmi              | MD           | S                     | Anesthesiology                   | Y                   | Wang                                                             |
| Kirsch, Thorsten        | MD           | S                     | Orthopedic Surgery               | Y                   | Lamont, Leucht, Rapp                                             |
| Kwa, Maryann            | MD           | S                     | Oncology                         | Y                   | Diefenbach, Novik, Ryan, Saint Fleur, Schiff, Wu                 |



|                       |         |    |                                   |   |                                                                                              |
|-----------------------|---------|----|-----------------------------------|---|----------------------------------------------------------------------------------------------|
| Lamont, Justin        | MD      | S  | Orthopedic Surgery                | Y | Culliford, Hazen, Kirsch, Leucht, Rapp                                                       |
| Leucht, Philipp       | MD, PhD | S  | Orthopaedic Trauma                | Y | Kirsch, Lamont, Schiff                                                                       |
| Liu, Jasmine          | BS      | NS | IRB Administration                | Y | Panageas                                                                                     |
| Lewis, Ariane         | MD      | S  | Neurocritical Care                | Y | Barr, Berk, Ross-Rizzo                                                                       |
| McGowan, Richard      | MLS     | NS | Public Services                   | Y | Panageas, Vieira                                                                             |
| McGregor, Kyle        | PhD     | S  | Child & Adolescent Psychiatry     | Y | Barr, Bogenschutz, Chervinsky, Frankle, Gallagher, Nishawala, Ross                           |
| More, Frederick       | DDS     | S  | Dentistry – Pediatric             | Y | Hazen, Katz, Nishawala, Novik, Wissner-Greene                                                |
| Moskovits, Tibor      | MD      | S  | Hematology – Oncology             | Y | Diefenbach, Esteva, Kwa, Ryan, Saint Fleur, Schiff, Wu                                       |
| Nishawala, Melissa    | MD      | S  | Child & Adolescent Psychiatry     | Y | Barr, Bogenschutz, Chervinsky, Frankle, Hazen, Katz, More, Novik, Ross, Wissner-Greene       |
| Nolan, Anna           | MD      | S  | Pulmonary                         | Y |                                                                                              |
| Novik, Yelena         | MD      | S  | Oncology                          | Y | Diefenbach, Esteva, Katz, Kwa, Hazen, More, Nishawala, Ryan, Saint Fleur, Wissner-Greene, Wu |
| Oshva, Lillian        | MD      | S  | Emergency Medicine                | Y | Ramirez                                                                                      |
| Ramirez, Michelle     | MD      | S  | Pediatric Critical Care           | Y | Brar                                                                                         |
| Rapp, Timothy         | MD      | S  | Orthopedic Surgery – Oncology     | Y | Culliford, Diefenbach, Esteva, Kirsch, Kwa, Lamont, Leucht, Ryan, Saint Fleur, Schiff, Wu    |
| Raskin, Joyce         | JD      | NS | Community Representative          | Y | Abramovitz, Basu Roy, Wu                                                                     |
| Ross, Stephen         | MD      | S  | Addiction Psychiatry              | Y | Barr, Bogenschutz, Chervinsky, Frankle, Nishawala                                            |
| Ross-Rizzo, John      | MD      | S  | Neurology                         | Y | Barr, Chervinsky,                                                                            |
| Rotrosen, John        | MD      | S  | Psychiatry                        | Y | Barr, Bogenschutz, Chervinsky, Frankle, Gallagher, Nishawala, Ross                           |
| Ryan, Theresa         | MD      | S  | Oncology                          | Y | Diefenbach, Esteva, Kwa, Novik, Saint Fleur, Schiff, Wu                                      |
| Saint Fleur, Shella   | MD      | S  | Hematology - Oncology             | Y | Diefenbach, Esteva, Kwa, Novik, Ryan, Schiff, Wu                                             |
| Schiff, Peter         | MD      | S  | Radiation – Oncology              | Y | Diefenbach, Esteva, Kwa, Ryan, Saint Fleur, Wu                                               |
| Storey, Elizabeth     | PhD     | S  | Radiation                         | Y | Bartlett, Gonen                                                                              |
| Tunik, Michael        | MD      | S  | Pediatric EM                      | Y | Brar, More, Ramirez                                                                          |
| Vieira, Dorice        | MA      | NS | Public Services                   | Y | McGowan, Panageas                                                                            |
| Wallach, David        | BA, MPH | NS | IRB Administration                | Y | Panageas                                                                                     |
| Wang, Jing            | MD      | S  | Anesthesiology                    | Y | Kim                                                                                          |
| Wissner-Greene, Loren | MD, MA  | S  | Medicine – Endocrinology – Ob-Gyn | Y | Brar, Hazen, Katz, More, Nishawala, Novik,                                                   |
| Wong, Doris           | PharmD  | S  | Pharmacy                          | Y | Ballani, Bliss, Dubrovskaya,                                                                 |
| Wu, Jennifer          | MD      | S  | Oncology                          | Y | Diefenbach, Esteva, Kwa, Ryan, Saint Fleur                                                   |
| Wu, Lillian           | BA, MA  | NS | Community Representative          | N | Abramovitz, Basu Roy, Raskin                                                                 |
